# Supplementary material for: Evidence of the Autophagic Process during the Fish Immune Response of Skeletal Muscle Cells against Piscirickettsia salmonis
Source: MDPI journal article supplement (doi:10.3390/ani13050880), 2023-02-28
Supplement: s1 [file s1]

**Supplementary Table S1.** Primer used for qPCR analysis

| Gene                          | Sequence 5' - 3' |                           | TM (°C) | % E    | GenBank code/reference |
|-------------------------------|------------------|---------------------------|---------|--------|------------------------|
| <i>tnfa</i>                   | Forward          | GCAGCCATCCATTTAGAGGGTGAA  | 60      | 100    | DQ787157.1             |
|                               | Reverse          | CTAAACGAAGCCTGGCTGTAAACG  |         |        |                        |
| <i>tlr3</i>                   | Forward          | CTGATTGCTTGAAGCCCAT       | 60      | 99.5   | NM_001124578.1         |
|                               | Reverse          | GCCTTTGAAGGTGGTGTGT       |         |        |                        |
| <i>tlr9</i>                   | Forward          | GGACAACCTGGCGTACCTTA      | 60      | 102.38 | NM_001129991.2         |
|                               | Reverse          | CCCATGCCTCTCATTAGGAA      |         |        |                        |
| <i>il-1<math>\beta</math></i> | Forward          | CCCCATTGAGACTAAAGCCA      | 60      | 109.8  | XM_014170479.2         |
|                               | Reverse          | GCAACCTCCTCTAGGTGCAG      |         |        |                        |
| <i>il-8</i>                   | Forward          | GCCCTCCTGACCATTACTGA      | 60      | 101.83 | NM_001140710.3         |
|                               | Reverse          | AAATCTCCTGACCGCTGTTG      |         |        |                        |
| <i>hepcidin</i>               | Forward          | GAAGGCCTTTAGTGTTGCAGTGGT  | 60      | 93     | AF542965.1             |
|                               | Reverse          | GTTGATGTTCCCCAACTGGACTGT  |         |        |                        |
| <i>mhc-II</i>                 | Forward          | AATCAGAGTGACCTGGTTGAG     | 60      | 110    | AJ439070.1             |
|                               | Reverse          | GTGGGAGAGGATCTGGTAGTA     |         |        |                        |
| <i>mhc-I</i>                  | Forward          | CAACGCCACAGGCAGTCA        | 60      | 97     | JN561338.1             |
|                               | Reverse          | CGGTACTCATTCTGAGCTGTGTTAC |         |        |                        |
| <i>becn1</i>                  | Forward          | TGGATGTCGAGAAGGGCAA       | 60      | 104.6  | [15]                   |
|                               | Reverse          | ATGAACTTGAGCGCCTTGG       |         |        |                        |
| <i>atg9</i>                   | Forward          | TGGGCAATCTGGTGTTCCTC      | 60      | 99.12  | [15]                   |
|                               | Reverse          | TGCACGTTTGTACTTGGGGT      |         |        |                        |
| <i>atgl2</i>                  | Forward          | CTTCAACCCCACAACAGCCTA     | 60      | 102.4  | [15]                   |
|                               | Reverse          | TCCTCCCTTTCTCTACCGACC     |         |        |                        |
| <i>gabrap</i>                 | Forward          | AGCCCCAAAGCAAGGATAG       | 60      | 92.37  | [15]                   |
|                               | Reverse          | CGCAGGTGGATTTCGTTTTCG     |         |        |                        |
| <i>atg5</i>                   | Forward          | ATTTCCAGAGCGTGACCTG       | 60      | 94.43  | [15]                   |
|                               | Reverse          | TGTCGTTGATGACCTGGCTC      |         |        |                        |
| <i>atg4</i>                   | Forward          | GCTGCGATGTGGACAGATGAT     | 43      | 95.43  | [15]                   |
|                               | Reverse          | AAGGAAGGCGTTGAGGATACC     |         |        |                        |
| <i>lc3</i>                    | Forward          | CAGCACCCCAACAAGATCCC      | 60      | 95.23  | [15]                   |
|                               | Reverse          | GCGCCTCCTGATGATTTTGA      |         |        |                        |
| <i>rab5a</i>                  | Forward          | ACGACATCACAAACGAGGAG      | 60      | 99.14  | XM_014178400.2         |
|                               | Reverse          | CCTGACAGAGCGATGACAAT      |         |        |                        |
| <i>rab5c</i>                  | Forward          | TGACATCACCAACACAGATACA    | 60      | 92.46  | XM_014192873.2         |
|                               | Reverse          | TTCCCTGCCAGTGCAATAA       |         |        |                        |
| <i>rab7a</i>                  | Forward          | TAAGAAGGTGCTGCTGAAGG      | 60      | 93.30  | XM_014128290.2         |
|                               | Reverse          | GGCCTTGTTACTGGTTACTGAA    |         |        |                        |
| <i>rab11a</i>                 | Forward          | TGGGAACCAGAGATGATGAATAC   | 60      | 96.05  | XM_014127757.2         |
|                               | Reverse          | GTGAAACGAGAGAGCAGGTT      |         |        |                        |
| <i>beta actin</i>             | Forward          | CCCATCTACGAGGGTTACGC      | 62      | 100.5  | XM_014194536.2         |
|                               | Reverse          | ACTCCTGCTTGCTGATCCAC      |         |        |                        |
| <i>ef-1a</i>                  | Forward          | CCCCTCCAGGACGTTTACAAA     | 56      | 104.6% | NM001123629.1          |
|                               | Reverse          | CACACGGCCACAGGTACA        |         |        |                        |
