# Supplementary material for: Evidence of the Autophagic Process during the Fish Immune Response of Skeletal Muscle Cells against Piscirickettsia salmonis
Source: MDPI journal article supplement (doi:10.3390/ani13050880), 2023-02-28
Supplement: s1 [file s1]

## LC3-II WB

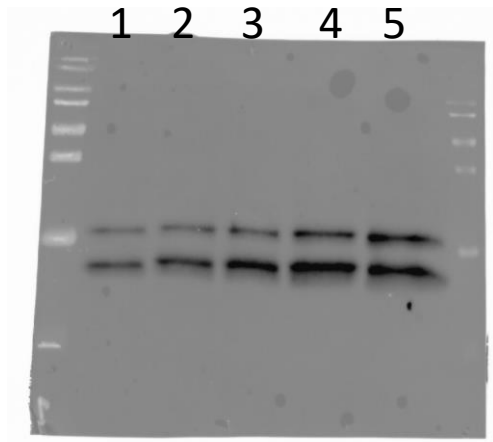

### Assay 1

1. Control
2. *P. salmonis* induced
3. Rapamycin treated
4. *P. salmonis* induced
5. Rapamycin treated

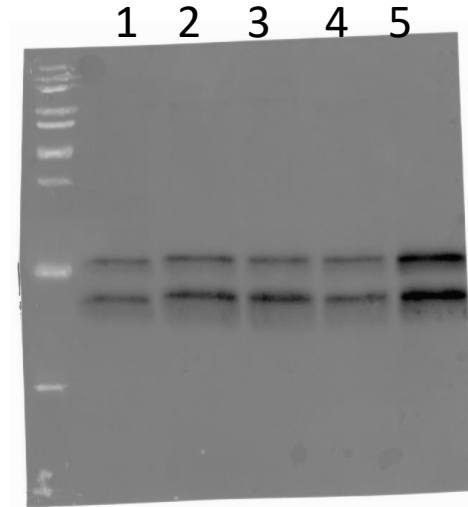

### Assay 2

1. Control
2. *P. salmonis* induced
3. Rapamycin treated
4. *P. salmonis* induced
5. Rapamycin treated

## Actin WB

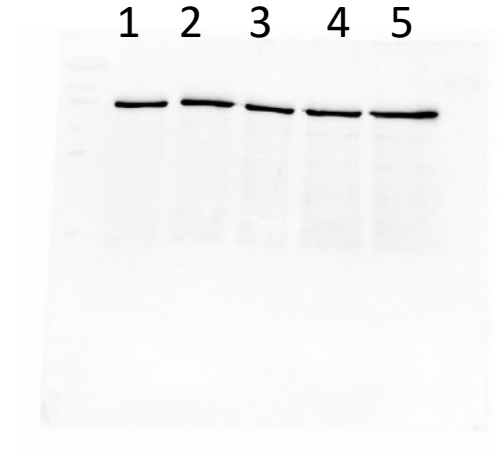

1. Control
2. *P. salmonis* induced
3. Rapamycin treated
4. *P. salmonis* induced
5. Rapamycin treated

## Rab7 WB

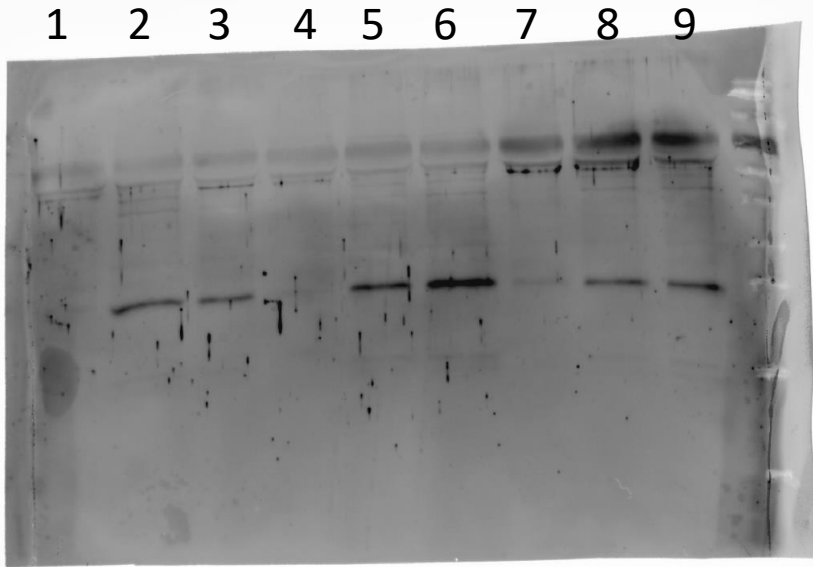

1. Rapamycin treated
2. Rapamycin treated
3. Rapamycin treated
4. *P. salmonis* induced
5. *P. salmonis* induced
6. *P. salmonis* induced
7. Control
8. Control
9. Control

## Actin WB

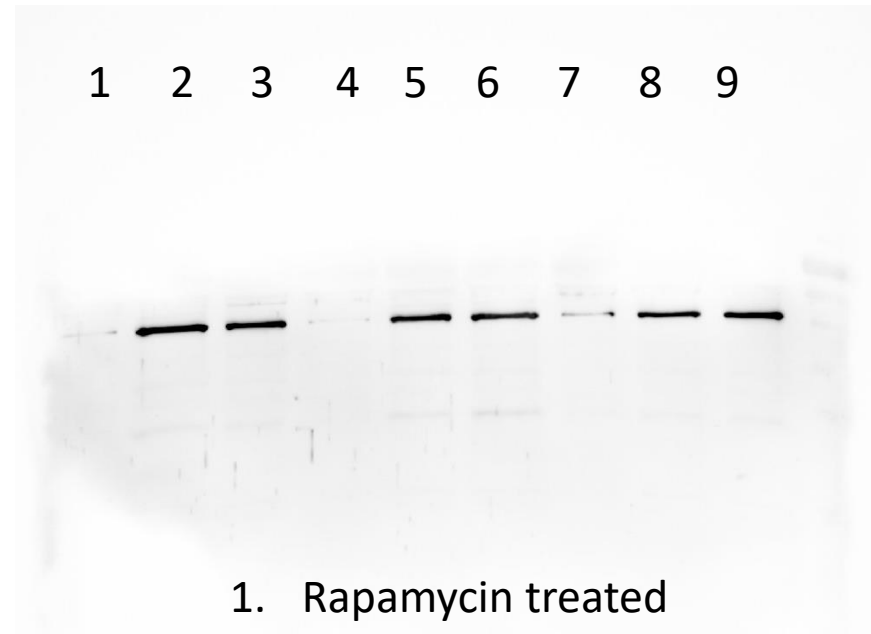

1. Rapamycin treated
2. Rapamycin treated
3. Rapamycin treated
4. *P. salmonis* induced
5. *P. salmonis* induced
6. *P. salmonis* induced
7. Control
8. Control
9. Control
