# Supplementary material for: Evidence of the Autophagic Process during the Fish Immune Response of Skeletal Muscle Cells against Piscirickettsia salmonis
Source: Animals (Basel). 2023 Feb 28;13(5):880. doi: 10.3390/ani13050880 (PMC10000225; doi:10.3390/ani13050880)
Supplement: Supplementary file 1 [file animals-13-00880-s001.zip]

Archive with 5 entries (5 files):
- animals-2212057-figure S4.pdf
- Figure S1.jpg
- Figure S2.jpg
- Figure S3.jpg
- Table S1, primers for qPCR.pdf
